# Supplementary material for: Data assimilation impact studies with the AROME-WMED reanalysis of the first special observation period of the Hydrological cycle in the Mediterranean Experiment
Source: Copernicus journal article supplement (doi:10.5194/nhess-21-463-2021), 2021-02-01
Supplement: Supplementary file 1 [file nhess-21-463-2021-supplement.pdf]

Supplement of Nat. Hazards Earth Syst. Sci., 21, 463–480, 2021  
<https://doi.org/10.5194/nhess-21-463-2021-supplement>  
© Author(s) 2021. This work is distributed under  
the Creative Commons Attribution 4.0 License.

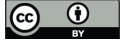

*Supplement of*

**Data assimilation impact studies with the AROME-WMED  
reanalysis of the first special observation period of the  
Hydrological cycle in the Mediterranean Experiment**

**Nadia Fourrié et al.**

*Correspondence to:* Nadia Fourrié ([nadia.fourrie@meteo.fr](mailto:nadia.fourrie@meteo.fr))

The copyright of individual parts of the supplement might differ from the CC BY 4.0 License.

Table S1: Root mean square differences (K) of observation minus simulation from background and analysis for SEVIRI channels 2 and 3 computed over the period from 5 September 00 UTC to 5 November 2012 18 UTC for REANA, NOGNSS and OPERGNSS.

|              | REANA | NOGNSS | OPERNSS |
|--------------|-------|--------|---------|
| FG channel 2 | 1,27  | 1,26   | 1,27    |
| AN channel 2 | 0,44  | 0,44   | 0,44    |
| FG channel 3 | 1,24  | 1,24   | 1,27    |
| AN channel 3 | 0,48  | 0,47   | 0,47    |
